# Supplementary material for: Chronic Ethanol Consumption Disrupts the Core Molecular Clock and Diurnal Rhythms of Metabolic Genes in the Liver without Affecting the Suprachiasmatic Nucleus
Source: PLoS One. 2013 Aug 12;8(8):e71684. doi: 10.1371/journal.pone.0071684 (PMC3741117; doi:10.1371/journal.pone.0071684)
Supplement: Table S1 — Genes examined in suprachiasmatic nucleus and/or liver of C57BL/6 mice. (XLSX) [file pone.0071684.s002.xlsx]

## Sheet: Sheet1
Table S1. Genes Examined in Suprachiasmatic Nucleus and/or Liver of C57BL/6 Mice
Gene Name	Symbol	RefSeq
Alcohol Metabolism
Alcohol dehydrogenase 1 (class I)a	Adh1	NM_007409.2
Aldehyde dehydrogenase 2, mitochondrial	Aldh2	NM_009656.3
Cytochrome P450, family 2, subfamily e, polypeptide 1	Cyp2e1	NM_021282.2
Clock Genes
Aryl hydrocarbon receptor nuclear translocator-like	Arntl, Bmal1, MOP3	NM_007489.3
CCR4 carbon catabolite repression 4-like (S. cerevisiae)	Ccrn4l, Nocturnin	NM_009834.2
Circadian locomotor output cycles kaput	Clock	NM_007715.5
Cryptochrome 1 (photolyase-like)	Cry1	NM_007771.3
Cryptochrome 2 (photolyase-like)	Cry2	NM_001113333.1; NM_009963.4
D site albumin promoter binding protein	Dbp	NM_016974.3
Hepatic leukemia factor	Hlf	NM_172563.3
Neuronal PAS domain protein 2	Npas2	NM_008719.2
Nuclear receptor subfamily 1, group D, member 1	Nr1d1, Rev-erbα	NM_145434.3
Period homolog 1 (Drosophila)	Per1	NM_001159367.1; NM_011065.4
Period homolog 2 (Drosophila)	Per2	NM_011066.3
Thyrotroph embryonic factor	Tef	NM_017376.3; NM_153484.3
Glucose Metabolism
Glucose-6-phosphatase, catalytic	G6pc	NM_008061.3
Phosphoenolpyruvate carboxykinase 1, cytosolic	Pck1	NM_011044.2
Pyruvate dehydrogenase kinase, isoenzyme 4	Pdk4	NM_013743.2
Lipid Metabolism
Acetyl-Coenzyme A carboxylase alpha	Acaca, Acc	NM_133360.2
Acyl-Coenzyme A dehydrogenase, medium chain	Acadm	NM_007382.4
Adiponectin receptor 1	Adipor1	NM_028320.3
Adiponectin receptor 2	Adipor2	NM_197985.3
Carnitine palmitoyltransferase 1a, liver	Cpt1a	NM_013495.2
Diacylglycerol O-acyltransferase 1	Dgat1	NM_010046.2
Diacylglycerol O-acyltransferase 2	Dgat2	NM_026384.3
Fatty acid binding protein 1, liver	Fabp1	NM_017399.4
Fatty acid synthase	Fasn	NM_007988.3
Glycerol-3-phosphate acyltransferase, mitochondrial	Gpam, Gpat1	NM_008149.3
Peroxisome proliferator activated receptor alpha	Ppara	NM_001113418.1; NM_011144.6
Peroxisome proliferator activated receptor gamma	Pparg	NM_001127330.1; NM_011146.3
Protein kinase, AMP-activated, alpha 1 catalytic subunit	Prkaa1	NM_001013367.3
Retinoic acid related orphan receptor alpha	Rora	NM_013646.1
Retinoid X receptor alpha	Rxra	NM_011305.3
Sterol regulatory element binding transcription factor 1	Srebf1, Srebp-1c	NM_011480.3
NAD Biosynthesis
Nicotinamide phosphoribosyltransferase	Nampt	NM_021524.2
Transcriptional Regulation
Peroxisome proliferative activated receptor, gamma, coactivator 1 alpha	Ppargc1a	NM_008904.2
Peroxisome proliferative activated receptor, gamma, coactivator 1 beta	Ppargc1b	NM_133249.2
Sirtuin 1 (silent mating type information regulation 2, homolog) 1 (S. cerevisiae)	Sirt1	NM_001159589.1; NM_001159590.1; NM_019812.2
SWI/SNF related, matrix associated, actin dependent regulator of chromatin, subfamily d, member 1	Smarcd1, Baf60a	NM_031842.2
aItalicized genes were only examined in the liver
