# Supplementary material for: Chronic Ethanol Consumption Disrupts the Core Molecular Clock and Diurnal Rhythms of Metabolic Genes in the Liver without Affecting the Suprachiasmatic Nucleus
Source: PLoS One. 2013 Aug 12;8(8):e71684. doi: 10.1371/journal.pone.0071684 (PMC3741117; doi:10.1371/journal.pone.0071684)
Supplement: Table S4 — Two-way ANOVA results of metabolic gene expression in liver. (XLSX) [file pone.0071684.s005.xlsx]

## Sheet: Sheet1
Table S4. Two-way ANOVA results of Metabolic Gene Expression in Liver
	ZT		Diet		Interaction
Gene	F (5,52)	p-value	F (1,52)	p-value	F (5,52)	p-value
Acaca	2.97397	0.019559	0.488232	0.48783	1.66024	0.160777
Acadm	2.11423	0.0783112	1.24421	0.26979	0.299864	0.910729
Adh1	5.6487	0.000311991	4.3762	0.0413445	0.361245	0.872649
AdipoR1	0.900128	0.488124	10.657	0.00194244	0.155342	0.977482
AdipoR2	0.248937	0.938487	0.359751	0.551249	0.284779	0.919358
Aldh2	1.1978	0.323242	14.5787	0.000359661	0.45076	0.810802
Cpt1a	4.32093	0.00231205	5.82939	0.0193149	0.184145	0.967359
Cyp2e1	2.70763	0.0300693	5.82806	0.019328	1.236	0.305779
Dgat1	0.471509	0.795755	0.147816	0.7022	0.0956172	0.992504
Dgat2	3.12894	0.0152396	2.44109	0.12426	0.522023	0.758463
Fabp1	1.72358	0.145626	13.0781	0.00067516	0.259966	0.932818
Fasn	0.747007	0.59198	0.257313	0.614117	0.509961	0.767433
G6pc	1.92345	0.106208	1.68481	0.200014	0.33106	0.891926
Gpam	0.50035	0.774555	3.90875	0.0533484	0.327012	0.894434
Nampt	8.87076	<0.0001	1.16471	0.285472	0.638788	0.671076
Pck1	2.99095	0.019031	0.194197	0.661273	0.696087	0.628765
Pdk4	1.64135	0.165959	0.393801	0.533108	1.53615	0.195199
Ppara	2.72026	0.0294616	4.20532	0.0453526	0.124707	0.986222
Pparg	2.90397	0.021897	0.475408	0.493575	0.140841	0.981886
Ppargc1a	3.17791	0.014086	6.03345	0.0174134	0.359043	0.874087
Ppargc1b	7.46435	<0.0001	4.21692	0.0450677	0.907283	0.483563
Prkaa1	1.79335	0.130499	0.780576	0.381031	0.40682	0.841895
Rora	1.04497	0.401459	6.10366	0.0168061	0.231898	0.946837
Rxra	1.27481	0.288862	1.45549	0.233109	0.605529	0.695924
Smarcd1	0.471116	0.796042	1.70695	0.197131	0.510655	0.766918
Sirt1	3.54854	0.00778601	16.9754	0.000136266	0.029532	0.999549
Srebp1c	3.26804	0.0121887	26.3679	<0.0001	1.15945	0.341601
